# Supplementary material for: A quantum thermometric sensing and analysis system using fluorescent nanodiamonds for the evaluation of living stem cell functions according to intracellular temperature
Source: Royal Society of Chemistry journal article supplement (doi:10.1039/d0na00146e), 2020-01-01
Supplement: d0na00146e1.pdf [file d0na00146e1.pdf]

## Supporting Information

Quantum thermometric sensing and analysis system by using fluorescent nanodiamonds for the evaluation of the living stem cell function according to intracellular temperature

Hiroshi Yukawa <sup>\*a,b,c</sup>, Masazumi Fujiwara <sup>\*d</sup>, Kaori Kobayashi <sup>b</sup>, Kazu Miyaji <sup>b</sup>, Yuka Kumon <sup>b</sup>, Yushi Nishimura <sup>c,d</sup>, Keisuke Oshimi <sup>d</sup>, Yumi Umehara <sup>d</sup>, Yoshio Teki <sup>d</sup>, Takayuki Iwasaki <sup>e</sup>, Mutsuko Hatano <sup>e</sup>, Hideki Hashimoto <sup>f</sup>, and Yoshinobu Baba <sup>\*a,b,c</sup>

- a) Institute of Nano-Life-Systems, Institutes of Innovation for Future Society, Nagoya University, Nagoya, Japan.
- b) Department of Biomolecular Engineering, Graduate School of Engineering, Nagoya University, Nagoya, Japan.
- c) Institute of Quantum Life Science, National Institutes for Quantum and Radiological Science and Technology, Chiba, Japan.
- d) Department of Chemistry, Graduate School of Science, Osaka City University, Osaka, Japan.
- e) Department of Electrical and Electronic Engineering, Graduate School of Engineering, Tokyo Institute of Technology, Tokyo, Japan.
- f) School of Science and Technology, Kwansai Gakuin University, Hyogo, Japan.

H. Yukawa and M. Fujiwara contributed equally to the work presented here and should therefore be regarded as equivalent.

## Supporting Figures

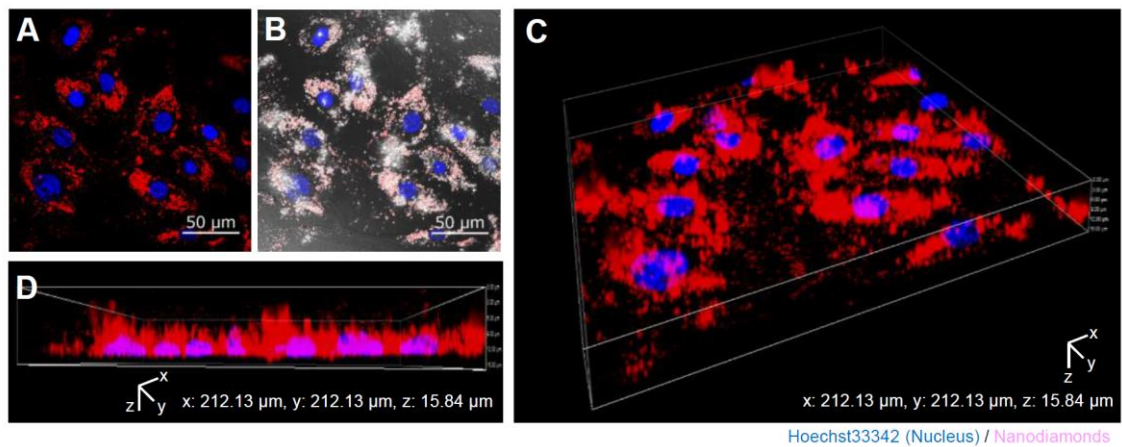

**Figure S1.** Observation of ASCs-FNDs. To investigate the transduction efficiency of FNDs to ASCs, ASCs were incubated with FNDs (250  $\mu\text{g}/\text{mL}$ ) in transduction medium (DMEM/F12 containing 2% FBS and 100 U/mL penicillin/streptomycin) at 37  $^{\circ}\text{C}$  for 24 h. The nuclei of ASCs were then stained with Hoechst33342 solution. The red fluorescence derived from FNDs transduced into ASCs was observed using high-speed multiphoton confocal laser microscopy, and ASCs were could to be labeled with FNDs with high efficiency (A-D).

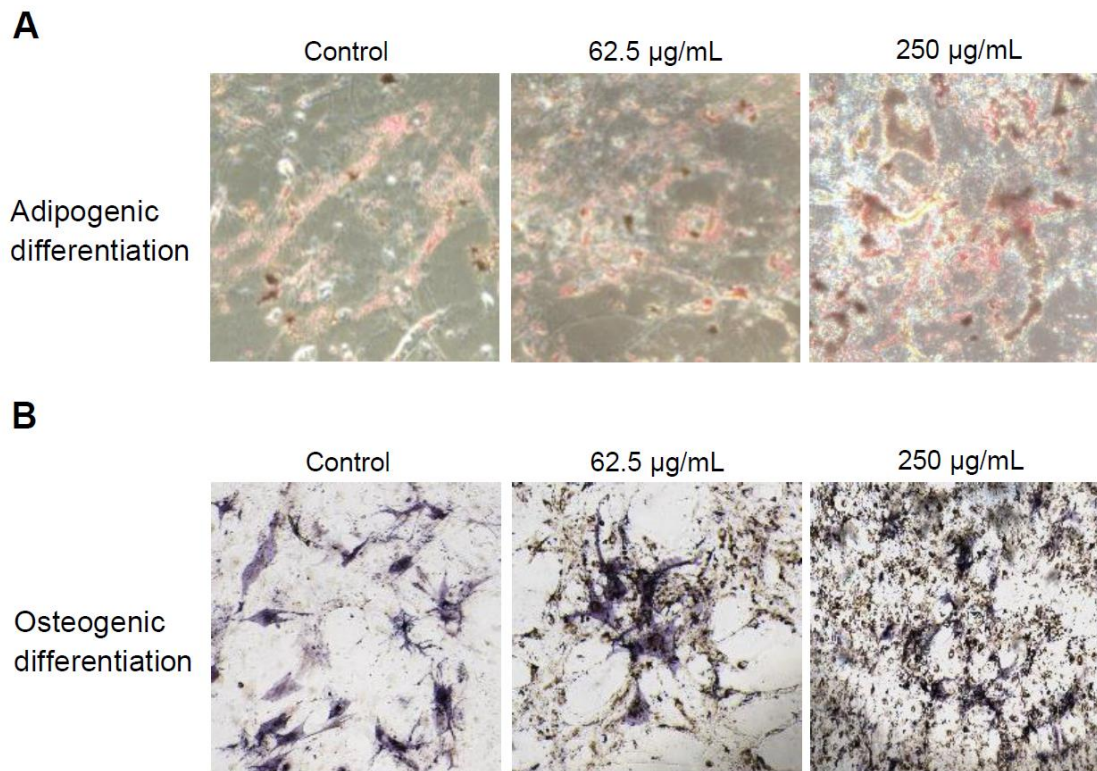

**Figure S2.** Differentiation ability of ASCs-FNDs. To investigate the influence of FNDs on the differentiation ability of ASCs, ASCs were labeled with FNDs (ASCs-FNDs), and then ASCs-FNDs were differentiated into adipocytes and osteocytes. The differentiation abilities of ASCs-FNDs into both adipocytes (A) and osteocytes (B) were similar to those of normal ASCs.

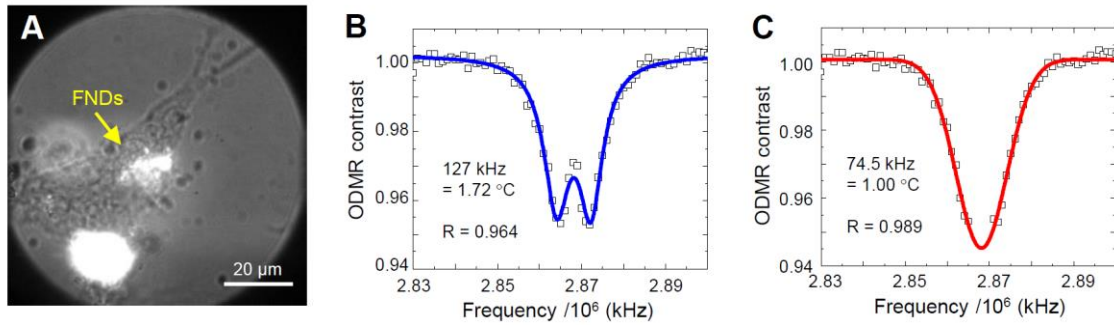

**Figure S3.** Quantum thermometry of ASCs-FNDs fixed on a coverslip in QTAS. A micrograph of ASCs in an in-house-crafted cell culture dish with white-light illumination and FND fluorescence (A). The ODMR spectrum of the FND indicated by a yellow arrow in (A) at 40.8 °C with fitted functions (B) and the same spectrum where the peak doublet was omitted from the fitting following the procedure reported previously (C).<sup>22</sup> The temperature-induced peak shift was in good agreement with the theoretical peak shift of 127 kHz calculated by  $\Delta T = 1.72$  °C, with the coefficient determined to be  $-74.5$  kHz/°C. These results suggested that QTAS was able to detect the temperature changes occurring in fixed ASCs.
